# Supplementary material
Source: MDPI journal article supplement (https://www.mdpi.com/2571-6255/7/4/117)
Supplement: s1 [file s1 › fire-2920755-supplementary.pdf]

## Supplementary material section

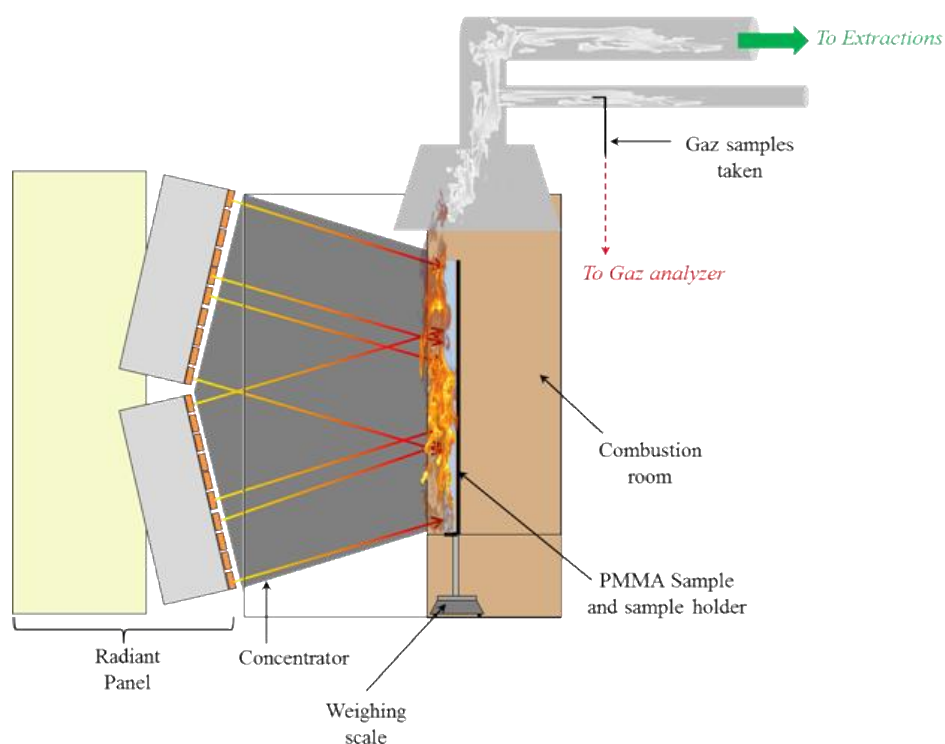

Figure S1: Schematic representation of RAPACES (side view)

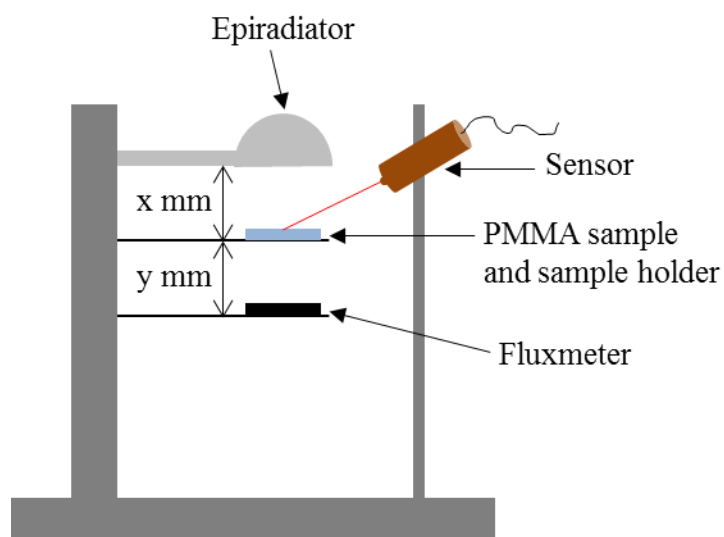

Figure S2: Schematic representation of epiradiator

With x is 30 mm (for a heat flux of 27 kW/m<sup>2</sup>) or 40 mm (for a heat flux of 31 kW/m<sup>2</sup>) and y is 10 mm.
